# Supplementary material for: Polymeric Micelles for the Enhanced Deposition of Hydrophobic Drugs into Ocular Tissues, without Plasma Exposure
Source: MDPI journal article supplement (doi:10.3390/pharmaceutics13050744), 2021-05-18
Supplement: s1 [file s1]

# Supplementary Information: Polymeric micelles for the enhanced deposition of hydrophobic drugs into ocular tissues, without plasma exposure

Ijeoma F. Uchegbu, Jan Breznikar, Alessandra Zaffalon, Uche Odunze and Andreas G. Schatzlein

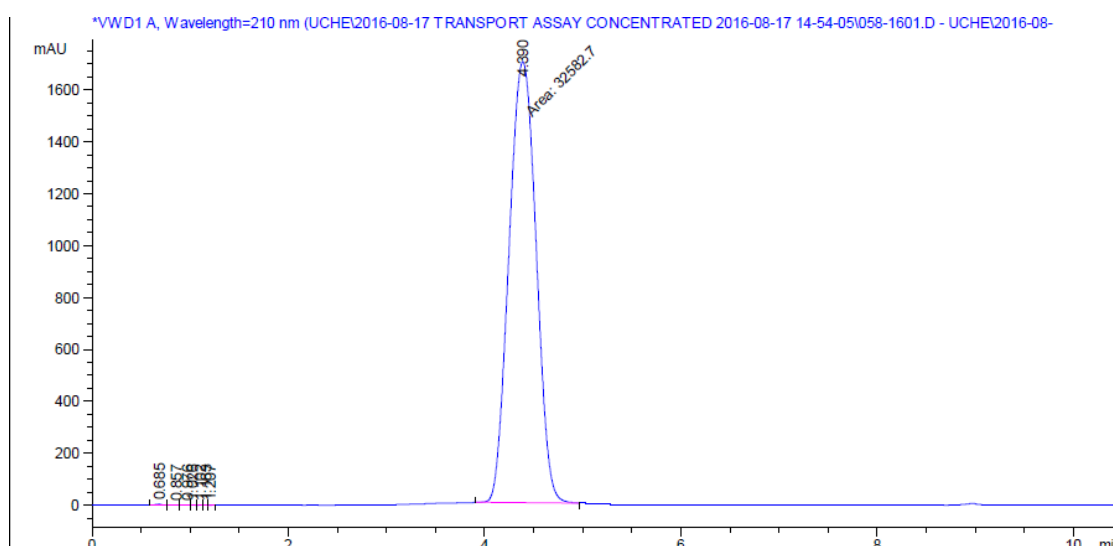

**Figure 1.** HPLC Chromatogram of CsA (1.25 mg mL<sup>-1</sup>).

**Table S1.** Preparation of CSA working standard solutions.

| Code | Dilutions        |         |                   | Final concentration |
|------|------------------|---------|-------------------|---------------------|
|      | Take amount (μL) | From    | Add methanol (μL) | CSA (ng/mL)         |
| WS14 | 200              | CsA STD | 0                 | 1,000,000           |
| WS13 | 100              | WS14    | 100               | 500000              |
| WS12 | 80               | WS13    | 120               | 200000              |
| WS11 | 100              | WS12    | 100               | 100000              |
| WS10 | 100              | WS11    | 100               | 50000               |
| WS9  | 100              | WS10    | 100               | 25000               |
| WS8  | 100              | WS9     | 100               | 12500               |
| WS7  | 100              | WS8     | 100               | 6250                |
| WS6  | 100              | WS7     | 100               | 3125                |
| WS5  | 100              | WS6     | 100               | 1562.50             |
| WS4  | 100              | WS5     | 100               | 781.25              |
| WS3  | 100              | WS4     | 100               | 390.63              |
| WS2  | 100              | WS3     | 100               | 195.31              |
| WS1  | 100              | WS2     | 100               | 97.67               |

| Code       | Dilutions                 |            |                            | Final concentration |
|------------|---------------------------|------------|----------------------------|---------------------|
|            | Take amount<br>( $\mu$ L) | From       | Add methanol<br>( $\mu$ L) | CSA<br>(ng/mL)      |
| <b>WS0</b> | 100                       | <b>WS1</b> | 100                        | 48.83               |

Table S2. Preparation CSA calibration standards.

| Sample Number | Spike volume ( $\mu$ L) | From | Final concentration (ng/mL) |
|---------------|-------------------------|------|-----------------------------|
| Std S14       | 1                       | WS14 | 10000                       |
| Std S13       | 1                       | WS13 | 5000                        |
| Std S12       | 1                       | WS12 | 2000                        |
| Std S11       | 1                       | WS11 | 1000                        |
| Std S10       | 1                       | WS10 | 500                         |
| Std S9        | 1                       | WS9  | 250                         |
| Std S8        | 1                       | WS8  | 125                         |
| Std S7        | 1                       | WS7  | 62.5                        |
| Std S6        | 1                       | WS6  | 31.25                       |
| Std S5        | 1                       | WS5  | 15.63                       |
| Std S4        | 1                       | WS4  | 7.81                        |
| Std S3        | 1                       | WS3  | 3.91                        |
| Std S2        | 1                       | WS2  | 1.95                        |
| Std S1        | 1                       | WS1  | 0.97                        |
| Std S0        | 1                       | WS0  | 0.49                        |

Table S3. Ion channel detector setting for the LC-MS/MS analysis of CsA.

| Ion Channels | Precursor Ion $\rightarrow$ Product Ion | MS1/MS2 resolution | Dwell | Fragmentator (V) | Collision Exit Potential (V) | Cell Acceleration Voltage (V) |
|--------------|-----------------------------------------|--------------------|-------|------------------|------------------------------|-------------------------------|
| CSA          | 1224.9 $\rightarrow$ 1112.7             | widest/widest      | 370   | 350              | 70                           | 1                             |
| CSA-d12      | 1236.9 $\rightarrow$ 1124.2             | widest/widest      | 250   | 350              | 75                           | 1                             |

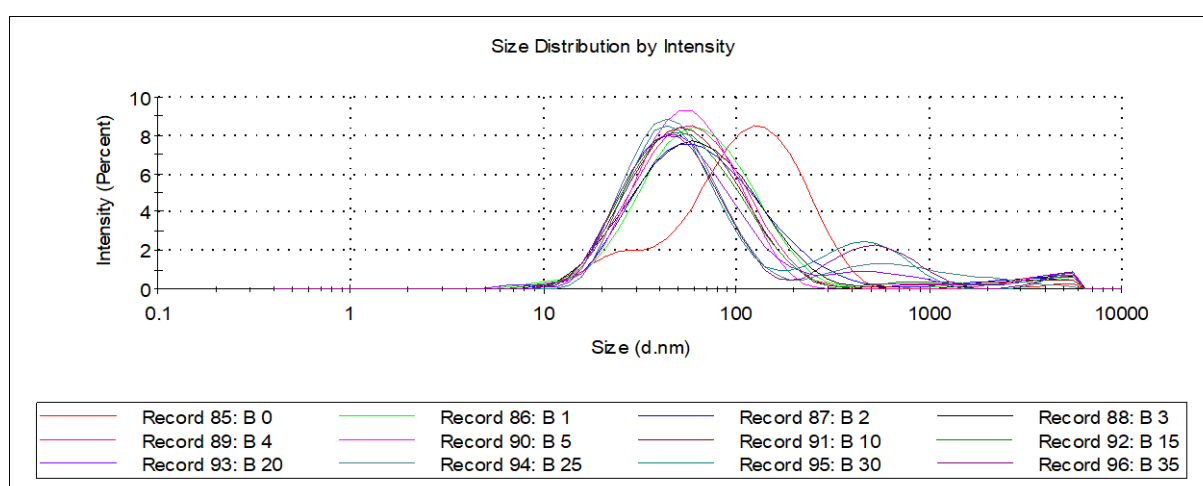

**Figure S2.** Particle size distribution following the application of increasing high pressure homogenisation cycles B0 (before high pressure homogenisation) – B35 (after 35 cycles). Above 15 cycles a second larger peak appears. High pressure homogenisation was thus limited to 15 cycles in Method II.
